# Supplementary material for: PTEN negatively regulates the cell lineage progression from NG2+ glial progenitor to oligodendrocyte via mTOR-independent signaling
Source: eLife. 2018 Feb 20;7:e32021. doi: 10.7554/eLife.32021 (PMC5839742; doi:10.7554/eLife.32021)
Supplement: Figure 1—figure supplement 1—source data 1. [file elife-32021-fig1-figsupp1-data1.xlsx]

## Sheet: F1-figure supplement
	Figure 1- figure supplement 1-Source Data
	Two-tailed unpaired Student's t test
		Group		Genotype	n	mean	SEM	P value	t	d.f.
	1A (WM)	Control		Pdgfra-CreER; R26-EYFP	6	370.5	± 25.97	0.0378	2.556	7
		Tsc1 cKO		Pdgfra-CreER; R26-EYFP; Tsc1f/f	3	266.5	± 22.20
	1A (GM)	Control		Pdgfra-CreER; R26-EYFP	6	344.7	± 26.65	0.0047	4.085	7
		Tsc1 cKO		Pdgfra-CreER; R26-EYFP; Tsc1f/f	3	183.3	± 9.535
	1B (WM)	Control		Pdgfra-CreER; R26-EYFP	6	124.7	± 9.234	0.0004	6.3	7
		Tsc1 cKO		Pdgfra-CreER; R26-EYFP; Tsc1f/f	3	39.06	± 2.223
	1B (GM)	Control		Pdgfra-CreER; R26-EYFP	6	174	± 9.223	0.0001	10.36	7
		Tsc1 cKO		Pdgfra-CreER; R26-EYFP; Tsc1f/f	3	31.33	± 4.087
	1C (WM)	Control		Pdgfra-CreER; R26-EYFP	6	90.8	± 11.20	0.6657	0.4485	7
		Tsc1 cKO		Pdgfra-CreER; R26-EYFP; Tsc1f/f	3	98.41	± 12.11
	1C (GM)	Control		Pdgfra-CreER; R26-EYFP	6	57.85	± 12.48	0.2325	1.292	7
		Tsc1 cKO		Pdgfra-CreER; R26-EYFP; Tsc1f/f	3	88.17	± 22.21
	1D (WM)	Control		Pdgfra-CreER; R26-EYFP	6	155	± 22.42	0.2317	1.309	7
		Tsc1 cKO		Pdgfra-CreER; R26-EYFP; Tsc1f/f	3	111.7	± 6.526
	1D (GM)	Control		Pdgfra-CreER; R26-EYFP	6	112.9	± 12.97	0.4136	0.8691	7
		Tsc1 cKO		Pdgfra-CreER; R26-EYFP; Tsc1f/f	3	96.22	± 3.940
	1E (WM)	OPC-Control		Pdgfra-CreER; R26-EYFP	6	41.96	± 3.695	0.9521	0.0622	7
		OPC-Tsc1 cKO		Pdgfra-CreER; R26-EYFP; Tsc1f/f	3	41.59	± 3.989
		PreOL-Control		Pdgfra-CreER; R26-EYFP	6	24.35	± 2.856	0.0111	3.42	7
		PreOL-Tsc1 cKO		Pdgfra-CreER; R26-EYFP; Tsc1f/f	3	43.19	± 5.481
		OL-Control		Pdgfra-CreER; R26-EYFP	6	33.69	± 2.665	0.0025	4.583	7
		OL-Tsc1 cKO		Pdgfra-CreER; R26-EYFP; Tsc1f/f	3	15.22	± 1.549
	1E (GM)	OPC-Control		Pdgfra-CreER; R26-EYFP	6	32.66	± 2.214	0.0006	5.876	7
		OPC-Tsc1 cKO		Pdgfra-CreER; R26-EYFP; Tsc1f/f	3	53.28	± 2.053
		PreOL-Control		Pdgfra-CreER; R26-EYFP	6	16.07	± 2.592	0.0096	3.53	7
		PreOL-Tsc1 cKO		Pdgfra-CreER; R26-EYFP; Tsc1f/f	3	29.73	± 1.159
		OL-Control		Pdgfra-CreER; R26-EYFP	6	51.26	± 3.189	0.0002	7.051	7
		OL-Tsc1 cKO		Pdgfra-CreER; R26-EYFP; Tsc1f/f	3	16.99	± 2.077
