# Supplementary material for: PTEN negatively regulates the cell lineage progression from NG2+ glial progenitor to oligodendrocyte via mTOR-independent signaling
Source: eLife. 2018 Feb 20;7:e32021. doi: 10.7554/eLife.32021 (PMC5839742; doi:10.7554/eLife.32021)
Supplement: Figure 1—source data 1. [file elife-32021-fig1-data1.xlsx]

## Sheet: Figure 1
	Figure 1- Source Data 1
	Two-tailed unpaired Student's t test
		Group		Genotype	n	mean	SEM	P value	t	d.f.
	1D	Control		Pdgfra-CreER; R26-EYFP	4	16.53	± 5.585	0.0421	2.575	6
		Tsc1 cKO		Pdgfra-CreER; R26-EYFP; Tsc1f/f	4	35.35	± 4.714
	1F (CC)	Control		Pdgfra-CreER; R26-EYFP	6	739	± 42.53	0.0004	6.375	7
		Tsc1 cKO		Pdgfra-CreER; R26-EYFP; Tsc1f/f	3	309.6	± 39.24
	1F (CTX)	Control		Pdgfra-CreER; R26-EYFP	6	214.5	± 14.76	0.385	0.9258	7
		Tsc1 cKO		Pdgfra-CreER; R26-EYFP; Tsc1f/f	3	193.9	± 8.241
	1G (CC)	Control		Pdgfra-CreER; R26-EYFP	6	496.1	± 54.12	0.0016	4.954	7
		Tsc1 cKO		Pdgfra-CreER; R26-EYFP; Tsc1f/f	3	99.41	± 17.72
	1 G (CTX)	Control		Pdgfra-CreER; R26-EYFP	6	52.65	± 4.631	0.0001	4.956	7
		Tsc1 cKO		Pdgfra-CreER; R26-EYFP; Tsc1f/f	3	15.91	± 4.584
	1H (CC)	Control		Pdgfra-CreER; R26-EYFP	6	87.11	± 18.96	0.7348	0.3526	7
		Tsc1 cKO		Pdgfra-CreER; R26-EYFP; Tsc1f/f	3	98.48	± 25.10
	1H (CTX)	Control		Pdgfra-CreER; R26-EYFP	6	28.19	± 4.453	0.0234	2.886	7
		Tsc1 cKO		Pdgfra-CreER; R26-EYFP; Tsc1f/f	3	53.96	± 9.316
	1I (CC)	Control		Pdgfra-CreER; R26-EYFP	6	155.8	± 13.88	0.0708	2.129	7
		Tsc1 cKO		Pdgfra-CreER; R26-EYFP; Tsc1f/f	3	111.7	± 6.164
	1I (CTX)	Control		Pdgfra-CreER; R26-EYFP	6	147	± 8.561	0.1156	1.796	7
		Tsc1 cKO		Pdgfra-CreER; R26-EYFP; Tsc1f/f	3	124	± 4.212
	1J (CC)	OPC-Control		Pdgfra-CreER; R26-EYFP	6	21.75	± 1.653	0.001	5.385	7
		OPC-Tsc1 cKO		Pdgfra-CreER; R26-EYFP; Tsc1f/f	3	37.69	± 2.605
		PreOL-Control		Pdgfra-CreER; R26-EYFP	6	12.73	± 3.337	0.0142	3.244	7
		PreOL-Tsc1 cKO		Pdgfra-CreER; R26-EYFP; Tsc1f/f	3	30.85	± 4.140
		OL-Control		Pdgfra-CreER; R26-EYFP	6	65.52	± 4.134	0.0015	5.031	7
		OL-Tsc1 cKO		Pdgfra-CreER; R26-EYFP; Tsc1f/f	3	31.46	± 4.638
	1J (CTX)	OPC-Control		Pdgfra-CreER; R26-EYFP	6	64.62	± 1.133	0.9122	0.1143	7
		OPC-Tsc1 cKO		Pdgfra-CreER; R26-EYFP; Tsc1f/f	3	64.42	± 0.8773
		PreOL-Control		Pdgfra-CreER; R26-EYFP	6	14.82	± 2.142	0.0063	3.852	7
		PreOL-Tsc1 cKO		Pdgfra-CreER; R26-EYFP; Tsc1f/f	3	27.99	± 2.080
		OL-Control		Pdgfra-CreER; R26-EYFP	6	23.27	± 2.034	0.0051	4.019	7
		OL-Tsc1 cKO		Pdgfra-CreER; R26-EYFP; Tsc1f/f	3	10.69	± 1.474
	1L (CC)	Control		Pdgfra-CreER; R26-EYFP	4	33.15	± 12.96	0.6681	0.4507	6
		Tsc1 cKO		Pdgfra-CreER; R26-EYFP; Tsc1f/f	4	26.96	± 4.519
	1L (CTX)	Control		Pdgfra-CreER; R26-EYFP	4	1.528	± 0.6111	0.0474	2.486	6
		Tsc1 cKO		Pdgfra-CreER; R26-EYFP; Tsc1f/f	4	4.965	± 1.240
	1M (CC)	Control		Pdgfra-CreER; R26-EYFP	6	411.2	± 34.17	0.8654	0.1758	7
		Tsc1 cKO		Pdgfra-CreER; R26-EYFP; Tsc1f/f	3	400.8	± 48.60
	1M (CTX)	Control		Pdgfra-CreER; R26-EYFP	6	233.9	± 11.8	0.0246	2.854	7
		Tsc1 cKO		Pdgfra-CreER; R26-EYFP; Tsc1f/f	3	183.5	± 5.625
	1O	MOG-Control		Tsc1f/f	3	100	± 23.49	0.0964	2.165	4
		MOG-Tsc1 cKO		Pdgfra-CreER; Tsc1f/f	3	48.9	± 2.360
		MBP-Control		Tsc1f/f	3	100.2	± 9.732	0.05	2.7	4
		MBP-Tsc1 cKO		Pdgfra-CreER; Tsc1f/f	3	58.33	± 12.09
		CNP-Control		Tsc1f/f	3	100.1	± 32.37	0.1202	1.97	4
		CNP-Tsc1 cKO		Pdgfra-CreER; Tsc1f/f	3	25.39	± 19.75
