# Supplementary material for: PTEN negatively regulates the cell lineage progression from NG2+ glial progenitor to oligodendrocyte via mTOR-independent signaling
Source: eLife. 2018 Feb 20;7:e32021. doi: 10.7554/eLife.32021 (PMC5839742; doi:10.7554/eLife.32021)
Supplement: Figure 2—figure supplement 1—source data 1. [file elife-32021-fig2-figsupp1-data1.xlsx]

## Sheet: F2-Supplement 1
	Figure 2-figure supplement 1-Source Data1
	Two-tailed unpaired Student's t-test
		Group		Genotype	n	mean	SEM	P value	t	d.f.
	1B (WM)	Control P20+21		Pdgfra-CreER; R26-EYFP	6	370.5	± 25.97	0.4157	0.8583	8
		Pten cKO P20+21		Pdgfra-CreER; R26-EYFP; Ptenf/f	4	436.5	± 88.10
		Control P45+30		Pdgfra-CreER; R26-EYFP	5	192.5	± 22.09	0.9206	0.1034	7
		Pten cKO P45+30		Pdgfra-CreER; R26-EYFP; Ptenf/f	4	195.7	± 19.13
	1B (GM)	Control P20+21		Pdgfra-CreER; R26-EYFP	6	344.7	± 26.65	0.036	2.516	8
		Pten cKO P20+21		Pdgfra-CreER; R26-EYFP; Ptenf/f	4	438.3	± 21
		Control P45+30		Pdgfra-CreER; R26-EYFP	5	164.9	± 7.715	0.002	4.796	7
		Pten cKO P45+30		Pdgfra-CreER; R26-EYFP; Ptenf/f	4	303.4	± 31.31
	1C (WM)	Control P20+21		Pdgfra-CreER; R26-EYFP	6	124.7	± 9.234	0.0426	2.408	8
		Pten cKO P20+21		Pdgfra-CreER; R26-EYFP; Ptenf/f	4	194.8	± 33.77
		Control P45+30		Pdgfra-CreER; R26-EYFP	4	49.97	± 8.261	0.05	2.338	6
		Pten cKO P45+30		Pdgfra-CreER; R26-EYFP; Ptenf/f	4	75.36	± 7.044
	1C (GM)	Control P20+21		Pdgfra-CreER; R26-EYFP	5	171.2	± 10.80	0.0031	4.408	7
		Pten cKO P20+21		Pdgfra-CreER; R26-EYFP; Ptenf/f	4	270	± 21.35
		Control P45+30		Pdgfra-CreER; R26-EYFP	5	36.69	± 3.038	0.0001	8.318	7
		Pten cKO P45+30		Pdgfra-CreER; R26-EYFP; Ptenf/f	4	180.7	± 18.89
	1D (WM)	Control P20+21		Pdgfra-CreER; R26-EYFP	6	155	± 22.42	0.8693	0.1699	8
		Pten cKO P20+21		Pdgfra-CreER; R26-EYFP; Ptenf/f	4	160.8	± 24.46
		Control P45+30		Pdgfra-CreER; R26-EYFP	5	71.23	± 6.493	0.2287	1.319	7
		Pten cKO P45+30		Pdgfra-CreER; R26-EYFP; Ptenf/f	4	86.67	± 10.36
	1D (GM)	Control P20+21		Pdgfra-CreER; R26-EYFP	6	112.9	± 12.97	0.3225	1.054	8
		Pten cKO P20+21		Pdgfra-CreER; R26-EYFP; Ptenf/f	4	132.6	± 11.69
		Control P45+30		Pdgfra-CreER; R26-EYFP	5	72.29	± 13.90	0.7879	0.2796	7
		Pten cKO P45+30		Pdgfra-CreER; R26-EYFP; Ptenf/f	4	77.31	± 9.844
	1E (WM)	Control P20+21		Pdgfra-CreER; R26-EYFP	3	241.5	± 53.04	0.6749	0.4517	4
		Pten cKO P20+21		Pdgfra-CreER; R26-EYFP; Ptenf/f	3	213.9	± 30.15
		Control P45+30		Pdgfra-CreER; R26-EYFP	3	114.6	± 25.37	0.1994	1.442	6
		Pten cKO P45+30		Pdgfra-CreER; R26-EYFP; Ptenf/f	5	156.7	± 16.90
	1E (GM)	Control P20+21		Pdgfra-CreER; R26-EYFP	3	144.8	± 12.05	0.2081	1.5	4
		Pten cKO P20+21		Pdgfra-CreER; R26-EYFP; Ptenf/f	3	174.3	± 15.53
		Control P45+30		Pdgfra-CreER; R26-EYFP	3	210.3	± 71.72	0.2574	1.251	6
		Pten cKO P45+30		Pdgfra-CreER; R26-EYFP; Ptenf/f	5	142.2	± 11.11
