# Supplementary material for: PTEN negatively regulates the cell lineage progression from NG2+ glial progenitor to oligodendrocyte via mTOR-independent signaling
Source: eLife. 2018 Feb 20;7:e32021. doi: 10.7554/eLife.32021 (PMC5839742; doi:10.7554/eLife.32021)
Supplement: Figure 2—source data 1. [file elife-32021-fig2-data1.xlsx]

## Sheet: Figure 2
	Figure 2- Source Data1
	Two-tailed unpaired Student's t-test
		Group		Genotype	n	mean	SEM	P value	t	d.f.
	2C	Control		Pdgfra-CreER; R26-EYFP	5	19.8	± 5.432	0.0248	2.757	8
		Pten cKO		Pdgfra-CreER; R26-EYFP; Ptenf/f	5	37.5	± 3.435
	2E (CC)	Control P20+21		Pdgfra-CreER; R26-EYFP	6	739	± 42.53	0.1372	1.632	9
		Pten cKO P20+21		Pdgfra-CreER; R26-EYFP; Ptenf/f	5	1082	± 227.1
		Control P45+30		Pdgfra-CreER; R26-EYFP	5	330	± 15.19	0.0011	5.303	7
		Pten cKO P45+30		Pdgfra-CreER; R26-EYFP; Ptenf/f	4	492.4	± 28.82
	2E (CTX)	Control P20+21		Pdgfra-CreER; R26-EYFP	7	218.8	± 13.22	0.0117	3.02	11
		Pten cKO P20+21		Pdgfra-CreER; R26-EYFP; Ptenf/f	6	268.2	± 8.512
		Control P45+30		Pdgfra-CreER; R26-EYFP	5	180.4	± 5.821	0.0452	2.434	7
		Pten cKO P45+30		Pdgfra-CreER; R26-EYFP; Ptenf/f	4	231.3	± 22.64
	2F (CC)	Control P20+21		Pdgfra-CreER; R26-EYFP	6	496.1	± 54.12	0.1093	1.777	9
		Pten cKO P20+21		Pdgfra-CreER; R26-EYFP; Ptenf/f	5	800	± 177.5
		Control P45+30		Pdgfra-CreER; R26-EYFP	5	109.3	± 18.20	0.0006	5.828	7
		Pten cKO P45+30		Pdgfra-CreER; R26-EYFP; Ptenf/f	4	257.5	± 16.91
	2F (CTX)	Control P20+21		Pdgfra-CreER; R26-EYFP	7	55.71	± 4.967	0.0002	5.583	10
		Pten cKO P20+21		Pdgfra-CreER; R26-EYFP; Ptenf/f	5	101.3	± 6.748
		Control P45+30		Pdgfra-CreER; R26-EYFP	5	32.07	± 4.416	0.0037	4.274	7
		Pten cKO P45+30		Pdgfra-CreER; R26-EYFP; Ptenf/f	4	83.33	± 12.41
	2G (CC)	Control P20+21		Pdgfra-CreER; R26-EYFP	6	155.8	± 13.88	0.8986	0.1311	9
		Pten cKO P20+21		Pdgfra-CreER; R26-EYFP; Ptenf/f	5	153	± 16.01
		Control P45+30		Pdgfra-CreER; R26-EYFP	5	167	± 18.65	0.456	0.7889	7
		Pten cKO P45+30		Pdgfra-CreER; R26-EYFP; Ptenf/f	4	190.2	± 23.23
	2G (CTX)	Control P20+21		Pdgfra-CreER; R26-EYFP	7	147	± 8.561	0.095	1.844	10
		Pten cKO P20+21		Pdgfra-CreER; R26-EYFP; Ptenf/f	5	125.3	± 8.138
		Control P45+30		Pdgfra-CreER; R26-EYFP	5	119.1	± 4.641	0.2102	1.379	7
		Pten cKO P45+30		Pdgfra-CreER; R26-EYFP; Ptenf/f	4	109.2	± 5.544
	2H (P20+21)	CC-OPC-Control		Pdgfra-CreER; R26-EYFP	6	21.75	± 1.653	0.3367	1.022	8
		CC-OPC-Pten cKO		Pdgfra-CreER; R26-EYFP; Ptenf/f	4	17.83	± 4.092
		CC-PreOL-Control		Pdgfra-CreER; R26-EYFP	6	12.73	± 3.337	0.4115	0.8664	8
		CC-PreOL-Pten cKO		Pdgfra-CreER; R26-EYFP; Ptenf/f	4	7.711	± 5.082
		CC-OL-Control		Pdgfra-CreER; R26-EYFP	6	65.52	± 4.134	0.1664	1.522	8
		CC-OL-Pten cKO		Pdgfra-CreER; R26-EYFP; Ptenf/f	4	74.46	± 3.553
		CTX-OPC-Control		Pdgfra-CreER; R26-EYFP	6	64.62	± 1.133	0.0021	4.265	8
		CTX-OPC-Pten cKO		Pdgfra-CreER; R26-EYFP; Ptenf/f	4	47.77	± 4.149
		CTX-PreOL-Control		Pdgfra-CreER; R26-EYFP	6	14.82	± 2.142	0.5549	0.6161	8
		CTX-PreOL-Pten cKO		Pdgfra-CreER; R26-EYFP; Ptenf/f	4	17.28	± 3.759
		CTX-OL-Control		Pdgfra-CreER; R26-EYFP	6	23.27	± 2.034	0.0022	4.432	8
		CTX-OL-Pten cKO		Pdgfra-CreER; R26-EYFP; Ptenf/f	4	38.35	± 2.858
	2H (P45+30)	CC-OPC-Control		Pdgfra-CreER; R26-EYFP	3	47.75	± 5.938	0.1614	1.643	5
		CC-OPC-Pten cKO		Pdgfra-CreER; R26-EYFP; Ptenf/f	4	37.96	± 2.786
		CC-PreOL-Control		Pdgfra-CreER; R26-EYFP	3	11.97	± 4.091	0.5361	0.6639	5
		CC-PreOL-Pten cKO		Pdgfra-CreER; R26-EYFP; Ptenf/f	4	9.284	± 1.833
		CC-OL-Control		Pdgfra-CreER; R26-EYFP	3	40.28	± 2.296	0.007	4.41	5
		CC-OL-Pten cKO		Pdgfra-CreER; R26-EYFP; Ptenf/f	4	52.76	± 1.757
		CTX-OPC-Control		Pdgfra-CreER; R26-EYFP	3	62.53	± 2.401	0.018	3.463	5
		CTX-OPC-Pten cKO		Pdgfra-CreER; R26-EYFP; Ptenf/f	4	48.09	± 3.089
		CTX-PreOL-Control		Pdgfra-CreER; R26-EYFP	3	17.08	± 4.011	0.8935	0.1408	5
		CTX-PreOL-Pten cKO		Pdgfra-CreER; R26-EYFP; Ptenf/f	4	16.43	± 2.720
		CTX-OL-Control		Pdgfra-CreER; R26-EYFP	3	20.39	± 1.703	4.052	0.0098	5
		CTX-OL-Pten cKO		Pdgfra-CreER; R26-EYFP; Ptenf/f	4	35.49	± 2.909
	2J (CC)	Control P20+21		Pdgfra-CreER; R26-EYFP	5	153.7	± 18.15	0.0232	2.8	8
		Pten cKO P20+21		Pdgfra-CreER; R26-EYFP; Ptenf/f	5	259.3	± 33.06
		Control P45+30		Pdgfra-CreER; R26-EYFP	3	168.3	± 19.05	0.0183	3.848	4
		Pten cKO P45+30		Pdgfra-CreER; R26-EYFP; Ptenf/f	3	309.5	± 31.35
	2J (CTX)	Control P20+21		Pdgfra-CreER; R26-EYFP	5	17.91	± 3.987	0.0042	3.961	8
		Pten cKO P20+21		Pdgfra-CreER; R26-EYFP; Ptenf/f	5	52.94	± 7.894
		Control P45+30		Pdgfra-CreER; R26-EYFP	3	6.133	± 1.761	0.0001	17.06	4
		Pten cKO P45+30		Pdgfra-CreER; R26-EYFP; Ptenf/f	3	36.77	± 0.3528
	2L (CC)	Control P20+21		Pdgfra-CreER; R26-EYFP	6	411.2	± 34.17	0.5409	0.6386	8
		Pten cKO P20+21		Pdgfra-CreER; R26-EYFP; Ptenf/f	4	462.8	± 86.63
		Control P45+30		Pdgfra-CreER; R26-EYFP	5	346.1	± 28.91	0.4234	0.8501	7
		Pten cKO P45+30		Pdgfra-CreER; R26-EYFP; Ptenf/f	4	417.3	± 87.80
	2L (CTX)	Control P20+21		Pdgfra-CreER; R26-EYFP	5	233.9	± 11.80	0.0511	2.248	9
		Pten cKO P20+21		Pdgfra-CreER; R26-EYFP; Ptenf/f	4	200.6	± 7.789
		Control P45+30		Pdgfra-CreER; R26-EYFP	5	196.8	± 10.03	0.0763	2.078	7
		Pten cKO P45+30		Pdgfra-CreER; R26-EYFP; Ptenf/f	4	173.2	± 0.8301
		Figure 1 H left			n	mean	SEM	P value	t	df
		CC-OLP-Control			6	21.75	± 1.653	0.3367	1.022	8
		CC-OLP-Pten cKO			4	17.83	± 4.092
		CC-PreOL-Control			6	12.73	± 3.337	0.4115	0.8664	8
		CC-PreOL-Pten cKO			4	7.711	± 5.082
		CC-OL-Control			6	65.52	± 4.134	0.1664	1.522	8
		CC-OL-Pten cKO			4	74.46	± 3.553
		CTX-OLP-Control			6	64.62	± 1.133	0.0021	4.265	8
		CTX-OLP-Pten cKO			4	47.77	± 4.149
		CTX-PreOL-Control			6	14.82	± 2.142	0.5549	0.6161	8
		CTX-PreOL-Pten cKO			4	17.28	± 3.759
		CTX-OL-Control			6	23.27	± 2.034	0.0022	4.432	8
		CTX-OL-Pten cKO			4	38.35	± 2.858
		Figure 1 H right			n	mean	SEM	P value	t	df
		CC-OLP-Control			3	47.75	± 5.938	0.1614	1.643	5
		CC-OLP-Pten cKO			4	37.96	± 2.786
		CC-PreOL-Control			3	11.97	± 4.091	0.5361	0.6639	5
		CC-PreOL-Pten cKO			4	9.284	± 1.833
		CC-OL-Control			3	40.28	± 2.296	0.007	4.41	5
		CC-OL-Pten cKO			4	52.76	± 1.757
		CTX-OLP-Control			3	62.53	± 2.401	0.018	3.463	5
		CTX-OLP-Pten cKO			4	48.09	± 3.089
		CTX-PreOL-Control			3	17.08	± 4.011	0.8935	0.1408	5
		CTX-PreOL-Pten cKO			4	16.43	± 2.720
		CTX-OL-Control			3	20.39	± 1.703	4.052	0.0098	5
		CTX-OL-Pten cKO			4	35.49	± 2.909
