# Supplementary material for: PTEN negatively regulates the cell lineage progression from NG2+ glial progenitor to oligodendrocyte via mTOR-independent signaling
Source: eLife. 2018 Feb 20;7:e32021. doi: 10.7554/eLife.32021 (PMC5839742; doi:10.7554/eLife.32021)
Supplement: Figure 3—figure supplement 1—source data 1. [file elife-32021-fig3-figsupp1-data1.xlsx]

## Sheet: F3-figure supplement 1
	Figure 3- figure supplement 1-Source data 1
	Two-tailed unpaired Student's t test
		Group		Genotype	n	mean	SEM	P value	t	d.f.
	1C	Control		Pdgfra-CreER; Mobp-EGFP	4	264.2	± 15.27	0.026	3.129	5
		Pten cKO		Pdgfra-CreER; Mobp-EGFP; Ptenf/f	3	353.8	± 26.56
	1E	Control		Pdgfra-CreER; Mobp-EGFP	4	91.04	± 10.80	0.0072	4.368	5
		Pten cKO		Pdgfra-CreER; Mobp-EGFP; Ptenf/f	3	169.2	± 14.98
