# Supplementary material for: PTEN negatively regulates the cell lineage progression from NG2+ glial progenitor to oligodendrocyte via mTOR-independent signaling
Source: eLife. 2018 Feb 20;7:e32021. doi: 10.7554/eLife.32021 (PMC5839742; doi:10.7554/eLife.32021)
Supplement: Figure 3—source data 1. [file elife-32021-fig3-data1.xlsx]

## Sheet: Figure 3
	Figure 3- Source data 1
	Two-tailed unpaired Student's t test
		Group		Genotype	n	mean	SEM	P value	t	d.f.
	3C (CC)	Control		Pdgfra-CreER; R26-EYFP	3	454.4	± 67.58	0.0417	2.721	5
		Pten cKO		Pdgfra-CreER; R26-EYFP; Ptenf/f	4	1020	± 169.0
	3C (CTX)	Control		Pdgfra-CreER; R26-EYFP	3	206.8	± 13.44	0.0105	3.986	5
		Pten cKO		Pdgfra-CreER; R26-EYFP; Ptenf/f	4	412.9	± 42.65
	3D (CC)	Control		Pdgfra-CreER; R26-EYFP	3	178.4	± 46.44	0.042	2.716	5
		Pten cKO		Pdgfra-CreER; R26-EYFP; Ptenf/f	4	650.8	± 143.3
	3D (CTX)	Control		Pdgfra-CreER; R26-EYFP	3	28.91	± 1.745	0.0039	5.073	5
		Pten cKO		Pdgfra-CreER; R26-EYFP; Ptenf/f	4	246.7	± 36.27
	3E (CC)	Control		Pdgfra-CreER; R26-EYFP	3	1449	± 274.4	0.0218	3.287	5
		Pten cKO		Pdgfra-CreER; R26-EYFP; Ptenf/f	4	2481	± 180.9
	3E (CTX)	Control		Pdgfra-CreER; R26-EYFP	3	324	± 69.63	0.0223	3.268	5
		Pten cKO		Pdgfra-CreER; R26-EYFP; Ptenf/f	4	546	± 29.55
	3F (CC)	Control		Pdgfra-CreER; R26-EYFP	3	194.2	± 10.85	0.0004	8.226	5
		Pten cKO		Pdgfra-CreER; R26-EYFP; Ptenf/f	4	16.57	± 16.57
	3F (CTX)	Control		Pdgfra-CreER; R26-EYFP	3	126.5	± 5.454	0.3273	1.085	5
		Pten cKO		Pdgfra-CreER; R26-EYFP; Ptenf/f	4	114	± 8.871
	3G (CC)	OPC-Control		Pdgfra-CreER; R26-EYFP	3	44.89	± 5.588	0.0005	8.101	5
		OPC-Pten cKO		Pdgfra-CreER; R26-EYFP; Ptenf/f	4	2.083	± 2.083
		PreOL-Control		Pdgfra-CreER; R26-EYFP	3	17.14	± 4.895	0.0174	3.495	5
		PreOL-Pten cKO		Pdgfra-CreER; R26-EYFP; Ptenf/f	4	35.14	± 2.638
		OL-Control		Pdgfra-CreER; R26-EYFP	3	31.96	± 6.938	0.0185	3.437	5
		OL-Pten cKO		Pdgfra-CreER; R26-EYFP; Ptenf/f	4	62.78	± 3.628
	3G (CTX)	OPC-Control		Pdgfra-CreER; R26-EYFP	3	62.11	± 6.093	0.0017	6.121	5
		OPC-Pten cKO		Pdgfra-CreER; R26-EYFP; Ptenf/f	4	28.13	± 1.859
		PreOL-Control		Pdgfra-CreER; R26-EYFP	3	24.01	± 6.122	0.1249	1.842	5
		PreOL-Pten cKO		Pdgfra-CreER; R26-EYFP; Ptenf/f	4	13.1	± 2.509
		OL-Control		Pdgfra-CreER; R26-EYFP	3	13.88	± 0.7637	0.0003	9.021	5
		OL-Pten cKO		Pdgfra-CreER; R26-EYFP; Ptenf/f	4	58.77	± 4.170
	3I (CC)	Control		Pdgfra-CreER; R26-EYFP	3	414.6	± 42.29	0.2295	1.368	5
		Pten cKO		Pdgfra-CreER; R26-EYFP; Ptenf/f	4	507.7	± 49.14
	3I (CTX)	Control		Pdgfra-CreER; R26-EYFP	3	215.3	± 23.51	0.5324	0.6702	5
		Pten cKO		Pdgfra-CreER; R26-EYFP; Ptenf/f	4	199.9	± 10.06
	3K (EYFP+NG2+)	Control		Pdgfra-CreER; R26-EYFP	3	6.822	± 1.403	0.0007	7.468	5
		Pten cKO		Pdgfra-CreER; R26-EYFP; Ptenf/f	4	36	± 3.149
	3K (EYFP+NG2-)	Control		Pdgfra-CreER; R26-EYFP	3	5.844	± 0.7153	0.0077	4.952	4
		Pten cKO		Pdgfra-CreER; R26-EYFP; Ptenf/f	3	10.69	± 0.6673
