# Supplementary material for: PTEN negatively regulates the cell lineage progression from NG2+ glial progenitor to oligodendrocyte via mTOR-independent signaling
Source: eLife. 2018 Feb 20;7:e32021. doi: 10.7554/eLife.32021 (PMC5839742; doi:10.7554/eLife.32021)
Supplement: Figure 4—source data 1. [file elife-32021-fig4-data1.xlsx]

## Sheet: Figure 4
	Figure 4-Source data 1
	Two-tailed unpaired Student's t test
		Group		Genotype	n	mean	SEM	P value	t	d.f.
	4C	PLP-Control		Ptenf/f	3	100	± 41.86	0.0348	3.141	4
		PLP-Pten cKO		Pdgfra-CreER; Ptenf/f	3	369.4	± 74.86
		MAG-Control		Ptenf/f	3	100.2	± 5.265	0.0718	2.432	4
		MAG-Pten cKO		Pdgfra-CreER; Ptenf/f	3	122	± 7.260
		MOG-Control		Ptenf/f	3	100.2	± 5.750	0.049	2.779	4
		MOG-Pten cKO		Pdgfra-CreER; Ptenf/f	3	127.8	± 8.133
		MBP-Control		Ptenf/f	3	101.1	± 23.53	0.065	2.178	4
		MBP-Pten cKO		Pdgfra-CreER; Ptenf/f	3	173.6	± 23.55
		CNP-Control		Ptenf/f	3	101.5	± 24.65	0.0144	4.134	4
		CNP-Pten cKO		Pdgfra-CreER; Ptenf/f	3	271.2	± 32.84
	4F	Control		R26-EYFP; Ptenf/f	3	0.7904	± 0.009	0.0387	3.033	4
		Pten cKO		Pdgfra-CreER; R26-EYFP; Ptenf/f	3	0.7153	± 0.022
	4G	Control		R26-EYFP; Ptenf/f	3	13.06	± 1.044	0.0335	3.181	4
		Pten cKO		Pdgfra-CreER; R26-EYFP; Ptenf/f	3	19.95	± 1.900
	4K	Control		Pdgfra-CreER; R26-mEGFP	3	1.48	± 0.26	0.0179	N/A	4
		Pten cKO		Pdgfra-CreER; R26-mEGFP; Ptenf/f	3	4.03	± 0.99
