# Supplementary material for: PTEN negatively regulates the cell lineage progression from NG2+ glial progenitor to oligodendrocyte via mTOR-independent signaling
Source: eLife. 2018 Feb 20;7:e32021. doi: 10.7554/eLife.32021 (PMC5839742; doi:10.7554/eLife.32021)
Supplement: Figure 5—source data 1. [file elife-32021-fig5-data1.xlsx]

## Sheet: Figure 5
	Figure 5 - Source data1
	Two-tailed unpaired Student's t test
		Group	Genotype	n	mean	SEM	P value	t	d.f.
	5B (CC)	Control	Mog-iCre; R26-EYFP	3	922.8	± 36.64	0.6294	0.5136	5
		Pten cKO	Mog-iCre; R26-EYFP; Ptenf/f	4	867.6	± 86.93
	5B (CTX)	Control	Mog-iCre; R26-EYFP	3	106.1	± 0.4953	0.6012	0.5576	5
		Pten cKO	Mog-iCre; R26-EYFP; Ptenf/f	4	109.6	± 5.233
	5B (WM)	Control	Mog-iCre; R26-EYFP	3	438.1	± 19.46	0.6604	0.4665	5
		Pten cKO	Mog-iCre; R26-EYFP; Ptenf/f	4	465.4	± 47.50
	5B (GM)	Control	Mog-iCre; R26-EYFP	3	513.1	± 24.25	0.7979	0.2701	5
		Pten cKO	Mog-iCre; R26-EYFP; Ptenf/f	4	549.3	± 111.9
	5C (CC)	Control	Mog-iCre; R26-EYFP	3	427.2	± 51.61	0.5928	0.5709	5
		Pten cKO	Mog-iCre; R26-EYFP; Ptenf/f	4	399.2	± 19.58
	5C (CTX)	Control	Mog-iCre; R26-EYFP	3	193.2	± 3.547	0.5896	0.576	5
		Pten cKO	Mog-iCre; R26-EYFP; Ptenf/f	4	208.4	± 22.15
	5C (WM)	Control	Mog-iCre; R26-EYFP	3	249.6	± 18.47	0.4717	0.794	4
		Pten cKO	Mog-iCre; R26-EYFP; Ptenf/f	3	277	± 29.12
	5C (GM)	Control	Mog-iCre; R26-EYFP	3	216.3	± 19.41	0.9708	0.03845	5
		Pten cKO	Mog-iCre; R26-EYFP; Ptenf/f	4	214.8	± 29.52
	5F	Control	R26-EYFP; Ptenf/f	3	0.7514	± 0.0039	0.0159	4.018	4
		Pten cKO	Mog-iCre; R26-EYFP; Ptenf/f	3	0.6866	± 0.0156
	5G	Control	R26-EYFP; Ptenf/f	3	33.39	± 4.070	0.763	0.3228	4
		Pten cKO	Mog-iCre; R26-EYFP; Ptenf/f	3	30.68	± 7.366
