# Supplementary material for: PTEN negatively regulates the cell lineage progression from NG2+ glial progenitor to oligodendrocyte via mTOR-independent signaling
Source: eLife. 2018 Feb 20;7:e32021. doi: 10.7554/eLife.32021 (PMC5839742; doi:10.7554/eLife.32021)
Supplement: Figure 6—figure supplement 1—source data 1. [file elife-32021-fig6-figsupp1-data1.xlsx]

## Sheet: F6-figure supplement 1
	Figure 6- figure supplement 1-Source data 1
	Two-tailed unpaired Student's t test
		Group	Genotype	n	mean	SEM	P value	t	d.f.
	1 D (EYFP+CC1+)	Control	Pdgfra-CreER; R26-EYFP	3	34.57	± 7.916	0.0008	9.109	4
		Pten cKO	Pdgfra-CreER; R26-EYFP; Ptenf/f	3	148.4	± 9.672
	1 D (BrdU+CC1+)	Control	Pdgfra-CreER; R26-EYFP	3	42.03	± 4.551	0.0412	2.969	4
		Pten cKO	Pdgfra-CreER; R26-EYFP; Ptenf/f	3	63.32	± 5.538
