# Supplementary material for: PTEN negatively regulates the cell lineage progression from NG2+ glial progenitor to oligodendrocyte via mTOR-independent signaling
Source: eLife. 2018 Feb 20;7:e32021. doi: 10.7554/eLife.32021 (PMC5839742; doi:10.7554/eLife.32021)
Supplement: Figure 6—source data 1. [file elife-32021-fig6-data1.xlsx]

## Sheet: Figure 6
	Figure 6-Source Data 1
	Two-tailed unpaired Student's t test
		Group	Genotype	n	mean	SEM	P value	t	d.f.
	6D	Control	Pdgfra-CreER; R26-EYFP	3	543.2	± 143.6	0.2403	1.283	7
		Pten cKO	Pdgfra-CreER; R26-EYFP; Ptenf/f	6	824.9	± 135.5
	6E	Control	Pdgfra-CreER; R26-EYFP	3	235.2	± 68.90	0.0106	3.661	6
		Pten cKO	Pdgfra-CreER; R26-EYFP; Ptenf/f	5	650.3	± 76.21
	6F	Control	Pdgfra-CreER; R26-EYFP	3	53.29	± 5.613	0.3748	0.9478	7
		Pten cKO	Pdgfra-CreER; R26-EYFP; Ptenf/f	6	69.25	± 11.22
	6G	OPC-Control	Pdgfra-CreER; R26-EYFP	3	12.12	± 4.444	0.3705	0.9569	7
		OPC-Pten cKO	Pdgfra-CreER; R26-EYFP; Ptenf/f	6	9.077	± 0.8779
		PreOL-Control	Pdgfra-CreER; R26-EYFP	3	44.81	± 2.964	0.0034	4.345	7
		PreOL-Pten cKO	Pdgfra-CreER; R26-EYFP; Ptenf/f	6	24.6	± 2.887
		OL-Control	Pdgfra-CreER; R26-EYFP	3	43.56	± 2.740	0.0039	4.226	7
		OL-Pten cKO	Pdgfra-CreER; R26-EYFP; Ptenf/f	6	67.4	± 3.652
	6J	Control < 0.25 µm	Ptenf/f	3	0.6911	± 0.0098	0.3433	1.074	4
		Pten cKO < 0.25 µm	Pdgfra-CreER; Ptenf/f	3	0.6791	± 0.0052
		Control (0.25 µm - 0.5 µm)	Ptenf/f	3	0.7472	± 0.0094	0.4804	0.7772	4
		Pten cKO (0.25 µm - 0.5 µm)	Pdgfra-CreER; Ptenf/f	3	0.7387	± 0.0054
		Control (0.5 µm - 1.0 µm)	Ptenf/f	3	0.792	± 0.0091	0.7188	0.3865	4
		Pten cKO (0.5 µm - 1.0 µm)	Pdgfra-CreER; Ptenf/f	3	0.7883	± 0.0030
		Control > 1 µm	Ptenf/f	3	0.8457	± 0.0050	0.0458	2.862	4
		Pten cKO > 1µm	Pdgfra-CreER; Ptenf/f	3	0.8267	± 0.0042
	6K	Control	Ptenf/f	3	0.7476	± 0.006	0.047	2.836	4
		Pten cKO	Pdgfra-CreER; Ptenf/f	3	0.7264	± 0.003
