# Supplementary material for: PTEN negatively regulates the cell lineage progression from NG2+ glial progenitor to oligodendrocyte via mTOR-independent signaling
Source: eLife. 2018 Feb 20;7:e32021. doi: 10.7554/eLife.32021 (PMC5839742; doi:10.7554/eLife.32021)
Supplement: Figure 7—figure supplement 1—source data 1. [file elife-32021-fig7-figsupp1-data1.xlsx]

## Sheet: F7-figure supplement 1
	Figure 7-figure supplement 1-Source data 1
	One way ANOVA with Bonferroni's Multiple Comparison Test (A - C)
	Two-tailed unpaired Student's t test (D)
		Group	Genotype	n	mean	SEM
	A (CC)	Control	Pdgfra-CreER; R26-EYFP	6	739	± 42.53
		Pten cKO	Pdgfra-CreER; R26-EYFP; Ptenf/f	4	930.4	± 218.1
		Pten-Mtor double cKO	Pdgfra-CreER; R26-EYFP; Ptenf/f ; Mtorf/f	4	892.3	± 63.17
		Bonferroni's Multiple Comparison Test		Mean Diff.	t	P value (One way ANOVA)	Summary	d.f. (total)	F
		Control vs Pten cKO		-191.4	1.199	P > 0.05	ns	13	0.8561
		Control vs Pten-Mtor double cKO		-153.3	0.9603	P > 0.05	ns
		Pten vs Pten-Mtor double cKO		38.08	0.2177	P > 0.05	ns
	A (CTX)	Control	Pdgfra-CreER; R26-EYFP	7	218.8	± 13.22
		Pten cKO	Pdgfra-CreER; R26-EYFP; Ptenf/f	6	268.2	± 8.512
		Pten-Mtor double cKO	Pdgfra-CreER; R26-EYFP; Ptenf/f ; Mtorf/f	4	296.9	± 12.11
		Bonferroni's Multiple Comparison Test		Mean Diff.	t	P value (One way ANOVA)	Summary	d.f. (total)	F
		Control vs Pten cKO		-49.39	3.129	P < 0.05	*	16	10.71
		Control vs Pten-Mtor double cKO		-78.1	4.392	P < 0.01	**
		Pten vs Pten-Mtor double cKO		-28.7	1.567	P > 0.05	ns
	B (CC)	Control	Pdgfra-CreER; R26-EYFP	6	496.1	± 54.12
		Pten cKO	Pdgfra-CreER; R26-EYFP; Ptenf/f	3	546.7	± 126.4
		Pten-Mtor double cKO	Pdgfra-CreER; R26-EYFP; Ptenf/f ; Mtorf/f	4	585.5	± 47.23
		Bonferroni's Multiple Comparison Test		Mean Diff.	t	P value (One way ANOVA)	Summary	d.f. (total)	F
		Control vs Pten cKO		-50.64	0.4936	P > 0.05	ns	12	0.4684
		Control vs Pten-Mtor double cKO		-89.48	0.9553	P > 0.05	ns
		Pten vs Pten-Mtor double cKO		-38.83	0.3504	P > 0.05	ns
	B (CTX)	Control	Pdgfra-CreER; R26-EYFP	6	58.71	± 4.686
		Pten cKO	Pdgfra-CreER; R26-EYFP; Ptenf/f	5	101.3	± 6.748
		Pten-Mtor double cKO	Pdgfra-CreER; R26-EYFP; Ptenf/f ; Mtorf/f	4	106.9	± 9.1
		Bonferroni's Multiple Comparison Test		Mean Diff.	t	P value (One way ANOVA)	Summary	d.f. (total)	F
		Control vs Pten cKO		-42.62	4.816	P < 0.01	**	14	17.28
		Control vs Pten-Mtor double cKO		-48.14	5.103	P < 0.001	***
		Pten vs Pten-Mtor double cKO		-5.524	0.5634	P > 0.05	ns
	C (CC)	Control	Pdgfra-CreER; R26-EYFP	6	155.8	± 13.88
		Pten cKO	Pdgfra-CreER; R26-EYFP; Ptenf/f	5	153	± 16.01
		Pten-Mtor double cKO	Pdgfra-CreER; R26-EYFP; Ptenf/f ; Mtorf/f	4	199.5	± 32.74
		Bonferroni's Multiple Comparison Test		Mean Diff.	t	P value (One way ANOVA)	Summary	d.f. (total)	F
		Control vs Pten cKO		2.764	0.1026	P > 0.05	ns	14	1.502
		Control vs Pten-Mtor double cKO		-43.71	1.522	P > 0.05	ns
		Pten vs Pten-Mtor double cKO		-46.48	1.557	P > 0.05	ns
	C (CTX)	Control	Pdgfra-CreER; R26-EYFP	6	147	± 8.561
		Pten cKO	Pdgfra-CreER; R26-EYFP; Ptenf/f	6	125.3	± 8.138
		Pten-Mtor double cKO	Pdgfra-CreER; R26-EYFP; Ptenf/f ; Mtorf/f	4	144.7	± 9.620
		Bonferroni's Multiple Comparison Test		Mean Diff.	t	P value (One way ANOVA)	Summary	d.f (total)	F
		Control vs Pten cKO		21.78	1.869	P > 0.05	ns	15	2.016
		Control vs Pten-Mtor double cKO		2.339	0.1795	P > 0.05	ns
		Pten vs Pten-Mtor double cKO		-19.44	1.492	P > 0.05	ns
		Group	Genotype	n	mean	SEM	P value	t	d.f.
	D (CC)	OPC-Pten cKO	Pdgfra-CreER; R26-EYFP; Ptenf/f	5	16.83	± 3.323	0.2879	1.15	7
		OPC-Pten;Mtor dcKO	Pdgfra-CreER; R26-EYFP; Ptenf/f ; Mtorf/f	4	21.98	± 2.764
		PreOL-Pten cKO	Pdgfra-CreER; R26-EYFP; Ptenf/f	5	10.05	± 4.577	0.7362	0.3506	7
		PreOL-Pten;Mtor dcKO	Pdgfra-CreER; R26-EYFP; Ptenf/f ; Mtorf/f	4	12.06	± 2.776
		OL-Pten cKO	Pdgfra-CreER; R26-EYFP; Ptenf/f	5	73.13	± 3.046	0.2576	1.232	7
		OL-Pten;Mtor dcKO	Pdgfra-CreER; R26-EYFP; Ptenf/f ; Mtorf/f	4	65.96	± 5.326
	D (CTX)	OPC-Pten cKO	Pdgfra-CreER; R26-EYFP; Ptenf/f	6	47.34	± 3.415	0.7712	0.3009	8
		OPC-Pten;Mtor dcKO	Pdgfra-CreER; R26-EYFP; Ptenf/f ; Mtorf/f	4	48.91	± 3.798
		PreOL-Pten cKO	Pdgfra-CreER; R26-EYFP; Ptenf/f	5	17.12	± 2.916	0.6118	0.531	7
		PreOL-Pten;Mtor dcKO	Pdgfra-CreER; R26-EYFP; Ptenf/f ; Mtorf/f	4	14.8	± 3.241
		OL-Pten cKO	Pdgfra-CreER; R26-EYFP; Ptenf/f	5	38.85	± 2.213	0.5587	0.6139	7
		OL-Pten;Mtor dcKO	Pdgfra-CreER; R26-EYFP; Ptenf/f ; Mtorf/f	4	36.29	± 2.542
