# Supplementary material for: PTEN negatively regulates the cell lineage progression from NG2+ glial progenitor to oligodendrocyte via mTOR-independent signaling
Source: eLife. 2018 Feb 20;7:e32021. doi: 10.7554/eLife.32021 (PMC5839742; doi:10.7554/eLife.32021)
Supplement: Figure 7—figure supplement 2—source data 1. [file elife-32021-fig7-figsupp2-data1.xlsx]

## Sheet: F7-figure supplement 2
	Figure 7-figure supplement 2-Source data 1
	One way ANOVA with Bonferroni's Multiple Comparison Test (B - D)
	Two-tailed unpaired Student's t test (E)
		Group	Genotype	n	mean	SEM
	B (WM)	Control	Pdgfra-CreER; R26-EYFP	6	370.5	± 25.97
		Mtor cKO	Pdgfra-CreER; R26-EYFP; Mtorf/f	4	296.1	± 32.19
		Pten-Mtor double cKO	Pdgfra-CreER; R26-EYFP; Ptenf/f; Mtorf/f	4	382.4	± 37.89
		Bonferroni's Multiple Comparison Test		Mean Diff.	t	P value (One way ANOVA)	Summary	d.f. (total)	F
		Control vs Mtor cKO		74.38	1.711	P > 0.05	ns	13	2.009
		Control vs Pten-Mtor double cKO		-11.87	0.273	P > 0.05	ns
		Mtor vs Pten-Mtor double cKO		-86.24	1.811	P > 0.05	ns
	B (GM)	Control	Pdgfra-CreER; R26-EYFP	6	344.7	± 26.65
		Mtor cKO	Pdgfra-CreER; R26-EYFP; Mtorf/f	4	293.5	± 33.66
		Pten-Mtor double cKO	Pdgfra-CreER; R26-EYFP; Ptenf/f; Mtorf/f	4	487.4	± 47.50
		Bonferroni's Multiple Comparison Test		Mean Diff.	t	P value (One way ANOVA)	Summary	d.f. (total)	F
		Control vs Mtor cKO		51.21	1.057	P > 0.05	ns	13	7.314
		Control vs Pten-Mtor double cKO		-142.8	2.946	P < 0.05	*
		Mtor vs Pten-Mtor double cKO		-194	3.654	P < 0.05	*
	C (WM)	Control	Pdgfra-CreER; R26-EYFP	6	124.7	± 9.234
		Mtor cKO	Pdgfra-CreER; R26-EYFP; Mtorf/f	3	70.17	± 11.56
		Pten-Mtor double cKO	Pdgfra-CreER; R26-EYFP; Ptenf/f; Mtorf/f	4	121.5	± 18.42
		Bonferroni's Multiple Comparison Test		Mean Diff.	t	P value (One way ANOVA)	Summary	d.f. (total)	F
		Control vs Mtor cKO		54.55	2.829	P > 0.05	ns	12	4.418
		Control vs Pten-Mtor double cKO		3.253	0.1848	P > 0.05	ns
		Mtor vs Pten-Mtor double cKO		-51.29	2.463	P > 0.05	ns
	C (GM)	Control	Pdgfra-CreER; R26-EYFP	5	167	± 7.996
		Mtor cKO	Pdgfra-CreER; R26-EYFP; Mtorf/f	4	85.44	± 19.38
		Pten-Mtor double cKO	Pdgfra-CreER; R26-EYFP; Ptenf/f; Mtorf/f	4	242.6	± 26.26
		Bonferroni's Multiple Comparison Test		Mean Diff.	t	P value (One way ANOVA)	Summary	d.f. (total)	F
		Control vs Mtor cKO		81.99	3.26	P < 0.05	*	12	17.58
		Control vs Pten-Mtor double cKO		-75.15	2.988	P < 0.05	*
		Mtor vs Pten-Mtor double cKO		-157.1	5.927	P <0.001	***
	D (WM)	Control	Pdgfra-CreER; R26-EYFP	6	155	± 22.42
		Mtor cKO	Pdgfra-CreER; R26-EYFP; Mtorf/f	4	131.3	± 17.27
		Pten-Mtor double cKO	Pdgfra-CreER; R26-EYFP; Ptenf/f; Mtorf/f	4	162.5	± 16.36
		Bonferroni's Multiple Comparison Test		Mean Diff.	t	P value (One way ANOVA)	Summary	d.f. (total)	F
		Control vs Mtor cKO		23.68	0.8225	P > 0.05	ns	13	0.5456
		Control vs Pten-Mtor double cKO		-7.516	0.2611	P > 0.05	ns
		Mtor vs Pten-Mtor double cKO		-31.19	0.9892	P > 0.05	ns
	D (GM)	Control	Pdgfra-CreER; R26-EYFP	6	112.9	± 12.97
		Mtor cKO	Pdgfra-CreER; R26-EYFP; Mtorf/f	4	147.5	± 13.09
		Pten-Mtor double cKO	Pdgfra-CreER; R26-EYFP; Ptenf/f; Mtorf/f	4	156.7	± 8.182
		Bonferroni's Multiple Comparison Test		Mean Diff.	t	P value (One way ANOVA)	Summary	d.f. (total)	F
		Control vs Mtor cKO		-34.66	2.003	P > 0.05	ns	13	3.786
		Control vs Pten-Mtor double cKO		-43.79	2.53	P > 0.05	ns
		Mtor vs Pten-Mtor double cKO		-9.131	0.4817	P > 0.05	ns
		Group	Genotype	n	mean	SEM	P value	t	d.f.
	E (WM)	OPC-Mtor cKO	Pdgfra-CreER; R26-EYFP; Mtorf/f	4	44.17	± 5.187	0.7369	0.352	6
		OPC-Pten-Mtor double cKO	Pdgfra-CreER; R26-EYFP; Ptenf/f; Mtorf/f	4	42.29	± 1.303
		PreOL-Mtor cKO	Pdgfra-CreER; R26-EYFP; Mtorf/f	4	27.8	± 3.350	0.7423	0.3444	6
		PreOL-Pten-Mtor double cKO	Pdgfra-CreER; R26-EYFP; Ptenf/f; Mtorf/f	4	26.09	± 3.689
		OL-Mtor cKO	Pdgfra-CreER; R26-EYFP; Mtorf/f	4	28.03	± 3.348	0.4377	0.8312	6
		OL-Pten;Mtor double cKO	Pdgfra-CreER; R26-EYFP; Ptenf/f; Mtorf/f	4	31.63	± 2.745
	E (GM)	OPC-Mtor cKO	Pdgfra-CreER; R26-EYFP; Mtorf/f	4	50.47	± 3.740	0.0069	4.025	6
		OPC-Pten-Mtor double cKO	Pdgfra-CreER; R26-EYFP; Ptenf/f; Mtorf/f	4	32.82	± 2.288
		PreOL-Mtor cKO	Pdgfra-CreER; R26-EYFP; Mtorf/f	4	21.2	± 2.578	0.4499	0.808	6
		PreOL-Pten;Mtor double cKO	Pdgfra-CreER; R26-EYFP; Ptenf/f; Mtorf/f	4	17.47	± 3.842
		OL-Mtor cKO	Pdgfra-CreER; R26-EYFP; Mtorf/f	4	28.33	± 3.257	0.0015	5.524	6
		OL-Pten;Mtor double cKO	Pdgfra-CreER; R26-EYFP; Ptenf/f; Mtorf/f	4	49.72	± 2.094
