# Supplementary material for: PTEN negatively regulates the cell lineage progression from NG2+ glial progenitor to oligodendrocyte via mTOR-independent signaling
Source: eLife. 2018 Feb 20;7:e32021. doi: 10.7554/eLife.32021 (PMC5839742; doi:10.7554/eLife.32021)
Supplement: Figure 7—source data 1. [file elife-32021-fig7-data1.xlsx]

## Sheet: Figure 7
	Figure 7-Source data 1
	Two-tailed unpaired Student's t test (A, H, K, L)
	ONE way ANOVA and Bonferronis's test (C, E, F, G)
		Group	Genotype	n	mean	SEM	P value	t	d.f.
	7A	OPC-Control	Pdgfra-CreER; R26-EYFP	4	0	-	-	-	-
		OPC-Pten cKO	Pdgfra-CreER; R26-EYFP; Ptenf/f	4	0	-
		PreOL-Control	Pdgfra-CreER; R26-EYFP	4	24.53	± 5.575	0.3111	1.106	6
		PreOL-Pten cKO	Pdgfra-CreER; R26-EYFP; Ptenf/f	4	31.78	± 3.454
		OL-Control	Pdgfra-CreER; R26-EYFP	4	76.68	± 3.660	0.1842	1.5	6
		OL-Pten cKO	Pdgfra-CreER; R26-EYFP; Ptenf/f	4	68.17	± 3.418
		Group	Genotype	n	mean	SEM
	7C	Control	Pdgfra-CreER; R26-EYFP	3	209.5	± 18.61
		Mtor cKO	Pdgfra-CreER; R26-EYFP; Mtorf/f	3	40.16	± 2.180
		Pten-Mtor double cKO	Pdgfra-CreER; R26-EYFP; Ptenf/f ; Mtorf/f	3	52.37	± 10.27
		Bonferroni's Multiple Comparison Test		Mean Diff.	t	P value (One way ANOVA)	Summary	d.f. (total)	F
		Control vs Mtor cKO		169.3	9.702	P < 0.001	***	8	58.55
		Control vs Pten-Mtor double cKO		157.1	9.002	P < 0.001	***
		Mtor cKO vs Pten-Mtor double cKO		-12.21	0.6998	P > 0.05	ns
		Group	Genotype	n	mean	SEM
	7E (CC)	Control	Pdgfra-CreER; R26-EYFP	6	739	± 42.53
		Mtor cKO	Pdgfra-CreER; R26-EYFP; Mtorf/f	4	511.7	± 45.24
		Pten-Mtor double cKO	Pdgfra-CreER; R26-EYFP; Ptenf/f ; Mtorf/f	4	892.3	± 63.17
		Bonferroni's Multiple Comparison Test		Mean Diff.	t	P value (One way ANOVA)	Summary	d.f. (total)	F
		Control vs Mtor cKO		227.3	3.281	P > 0.05	ns	13	12.78
		Control vs Pten-Mtor double cKO		-153.3	2.213	P > 0.05	ns
		Mtor cKO vs Pten-Mtor double cKO		-380.6	5.015	P < 0.01	**
		Group	Genotype	n	mean	SEM
	7E (CTX)	Control	Pdgfra-CreER; R26-EYFP	7	218.8	± 13.22
		Mtor cKO	Pdgfra-CreER; R26-EYFP; Mtorf/f	4	231.2	± 16.73
		Pten-Mtor double cKO	Pdgfra-CreER; R26-EYFP; Ptenf/f ; Mtorf/f	4	269.9	± 12.11
		Bonferroni's Multiple Comparison Test		Mean Diff.	t	P value (One way ANOVA)	Summary	d.f. (total)	F
		Control vs Mtor cKO		-12.37	0.6861	P > 0.05	ns	14	9.831
		Control vs Pten-Mtor double cKO		-78.1	4.33	P < 0.01	**
		Mtor cKO vs Pten-Mtor double cKO		-65.72	3.23	P < 0.05	*
		Group	Genotype	n	mean	SEM
	7F (CC)	Control	Pdgfra-CreER; R26-EYFP	6	496.1	± 54.12
		Mtor cKO	Pdgfra-CreER; R26-EYFP; Mtorf/f	4	190.8	± 38.69
		Pten-Mtor double cKO	Pdgfra-CreER; R26-EYFP; Ptenf/f ; Mtorf/f	4	585.5	± 47.23
		Bonferroni's Multiple Comparison Test		Mean Diff.	t	P value (One way ANOVA)	Summary	d.f (total)	F
		Control vs Mtor cKO		305.2	4.307	P < 0.01	**	13	14.58
		Control vs Pten-Mtor double cKO		-89.48	1.263	P > 0.05	ns
		Mtor cKO vs Pten-Mtor double cKO		-394.7	5.084	P < 0.01	**
		Group	Genotype	n	mean	SEM
	7F (CTX)	Control	Pdgfra-CreER; R26-EYFP	6	58.71	± 4.686
		Mtor cKO	Pdgfra-CreER; R26-EYFP; Mtorf/f	4	29.22	± 5.435
		Pten-Mtor double cKO	Pdgfra-CreER; R26-EYFP; Ptenf/f ; Mtorf/f	4	106.9	± 9.1
		Bonferroni's Multiple Comparison Test		Mean Diff.	t	P value (One way ANOVA)	Summary	d.f. (total)	F
		Control vs Mtor cKO		29.49	3.382	P < 0.05	*	13	33.84
		Control vs Pten-Mtor double cKO		-48.14	5.521	P < 0.001	***
		Mtor cKO vs Pten-Mtor double cKO		-77.63	8.127	P < 0.001	***
		Group	Genotype	n	mean	SEM
	7G (CC)	Control	Pdgfra-CreER; R26-EYFP	6	155.8	± 13.88
		Mtor cKO	Pdgfra-CreER; R26-EYFP; Mtorf/f	4	209.7	± 22.17
		Pten-Mtor double cKO	Pdgfra-CreER; R26-EYFP; Ptenf/f ; Mtorf/f	4	199.5	± 32.74
		Bonferroni's Multiple Comparison Test		Mean Diff.	t	P value (One way ANOVA)	Summary	d.f. (total)	F
		Control vs Mtor cKO		-53.91	1.768	P > 0.05	ns	13	1.878
		Control vs Pten-Mtor double cKO		-43.71	1.434	P > 0.05	ns
		Mtor cKO vs Pten-Mtor double cKO		10.2	0.3055	P > 0.05	ns
		Group	Genotype	n	mean	SEM
	7G (CTX)	Control	Pdgfra-CreER; R26-EYFP	6	147	± 8.561
		Mtor cKO	Pdgfra-CreER; R26-EYFP; Mtorf/f	4	154.5	± 4.484
		Pten-Mtor double cKO	Pdgfra-CreER; R26-EYFP; Ptenf/f ; Mtorf/f	4	144.7	± 9.620
		Bonferroni's Multiple Comparison Test		Mean Diff.	t	P value (One way ANOVA)	Summary	d.f. (total)	F
		Control vs Mtor cKO		-7.507	0.6473	P > 0.05	ns	13	0.3358
		Control vs Pten-Mtor double cKO		2.339	0.2017	P > 0.05	ns
		Mtor cKO vs Pten-Mtor double cKO		9.846	0.775	P > 0.05	ns
		Group	Genotype	n	mean	SEM	P value	t	d.f.
	7H (CC)	OPC-Mtor cKO	Pdgfra-CreER; R26-EYFP; Mtorf/f	4	42.1	± 4.138	0.0068	4.042	6
		OPC-Pten-Mtor double cKO	Pdgfra-CreER; R26-EYFP; Ptenf/f ; Mtorf/f	4	21.98	± 2.764
		PreOL-Mtor cKO	Pdgfra-CreER; R26-EYFP; Mtorf/f	4	22.57	± 2.525	0.0311	2.803	6
		PreOL-Pten;Mtor dcKO	Pdgfra-CreER; R26-EYFP; Ptenf/f ; Mtorf/f	4	12.06	± 2.776
		OL-Mtor cKO	Pdgfra-CreER; R26-EYFP; Mtorf/f	4	35.33	± 4.705	0.005	4.31	6
		OL-Pten;Mtor dcKO	Pdgfra-CreER; R26-EYFP; Ptenf/f ; Mtorf/f	4	65.96	± 5.326
	7H (CTX)	OPC-Mtor cKO	Pdgfra-CreER; R26-EYFP; Mtorf/f	4	67.03	± 1.831	0.0051	4.297	6
		OPC-Pten;Mtor dcKO	Pdgfra-CreER; R26-EYFP; Ptenf/f ; Mtorf/f	4	48.91	± 3.798
		PreOL-Mtor cKO	Pdgfra-CreER; R26-EYFP; Mtorf/f	4	20.43	± 2.383	0.2111	1.4	6
		PreOL-Pten;Mtor dcKO	Pdgfra-CreER; R26-EYFP; Ptenf/f ; Mtorf/f	4	14.8	± 3.241
		OL-Mtor cKO	Pdgfra-CreER; R26-EYFP; Mtorf/f	4	14.25	± 1.252	0.001	6.919	6
		OL-Pten;Mtor dcKO	Pdgfra-CreER; R26-EYFP; Ptenf/f ; Mtorf/f	4	36.29	± 2.542
	7K	Control	R26-EYFP; Ptenf/f	3	0.7904	± 0.009	0.0034	6.212	4
		Pten-Mtor double cKO	Pdgfra-CreER; R26-EYFP; Ptenf/f ; Mtorf/f	3	0.7111	± 0.008
	7L	Control	R26-EYFP; Ptenf/f	3	13.06	± 1.044	0.0012	8.219	4
		Pten-Mtor double cKO	Pdgfra-CreER; R26-EYFP; Ptenf/f ; Mtorf/f	3	25.29	± 1.062
