# Supplementary material for: PTEN negatively regulates the cell lineage progression from NG2+ glial progenitor to oligodendrocyte via mTOR-independent signaling
Source: eLife. 2018 Feb 20;7:e32021. doi: 10.7554/eLife.32021 (PMC5839742; doi:10.7554/eLife.32021)
Supplement: Figure 8—source data 1. [file elife-32021-fig8-data1.xlsx]

## Sheet: Figure 8
	Figure 8-Source data 1
	Paired t test (D, G, H)
	Two-tailed unpaired Student's t test (E)
		Group	Genotype	n	mean of differences		p value	t	d.f.
	8D	OPC vs pre-OL	Wild type	3 pairs	-69		0.0282	5.825	2
		Group	Genotype	n	mean	SEM	P value	t	d.f.
	8E	Control	Pdgfra-CreER; R26-EYFP	3	99.5	± 6.441	0.0138	4.191	4
		Pten cKO	Pdgfra-CreER; R26-EYFP; Ptenf/f	3	226.8	± 29.68
	8F	Control	Olig1-Cre (Olig1Cre/wt)	1			NA	NA	NA
		Pten cKO	Olig1-Cre; Ptenf/f	1
		Group	Genotype	n	mean of differences		p value	t	d.f.
	8G	Control	Ptenf/f	3 pairs	-56.3		0.0924	3.057	2
		Pten cKO	Pdgfra-CreER; Ptenf/f
	8H	Control	Ptenf/f	3 pairs	-20.61		0.0679	3.641	2
		Pten cKO	Pdgfra-CreER; Ptenf/f
