# Supplementary material for: PTEN negatively regulates the cell lineage progression from NG2+ glial progenitor to oligodendrocyte via mTOR-independent signaling
Source: eLife. 2018 Feb 20;7:e32021. doi: 10.7554/eLife.32021 (PMC5839742; doi:10.7554/eLife.32021)
Supplement: Figure 9—figure supplement 1—source data 1. [file elife-32021-fig9-figsupp1-data1.xlsx]

## Sheet: F9-figure supplement 
	Figure 9-figure supplement 1-Source data 1
	Two-tailed unpaired Student's t test
		Group	Genotype	n	mean	SEM	P value	t	d.f.
	1A (CC)	Control	Mog-iCre; R26-EYFP	3	1338	± 387.4	0.5332	0.6812	4
		Gsk3b cKO	Mog-iCre; R26-EYFP; Gsk3bf/f	3	1046	± 182
	1A (CTX)	Control	Mog-iCre; R26-EYFP	3	194.3	± 30	0.9531	0.06254	4
		Gsk3b cKO	Mog-iCre; R26-EYFP; Gsk3bf/f	3	197	± 31.42
	1B (CC)	Control	Mog-iCre; R26-EYFP	3	604	± 85.64	0.5091	0.724	4
		Gsk3b cKO	Mog-iCre; R26-EYFP; Gsk3bf/f	3	534.1	± 44.43
	1B (CTX)	Control	Mog-iCre; R26-EYFP	3	219.3	± 7.406	0.9892	0.0144	4
		Gsk3b cKO	Mog-iCre; R26-EYFP; Gsk3bf/f	3	219.4	± 1.878
	1D	MAG-Control	Gsk3bf/f	4	104.7	± 3.114	0.6891	0.42	6
		MAG-Gsk3b cKO	Mog-iCre; Gsk3bf/f	4	107.9	± 6.862
		MBP-Control	Gsk3bf/f	4	99.88	± 8.878	0.0045	4.418	6
		MBP-Gsk3b cKO	Mog-iCre; Gsk3bf/f	4	195.6	± 19.77
		CNP-Control	Gsk3bf/f	4	99.99	± 11.43	0.0191	3.18	6
		CNP-Gsk3bcKO	Mog-iCre; Gsk3bf/f	4	152	± 11.68
