# Supplementary material for: PTEN negatively regulates the cell lineage progression from NG2+ glial progenitor to oligodendrocyte via mTOR-independent signaling
Source: eLife. 2018 Feb 20;7:e32021. doi: 10.7554/eLife.32021 (PMC5839742; doi:10.7554/eLife.32021)
Supplement: Figure 9—source data 1. [file elife-32021-fig9-data1.xlsx]

## Sheet: Figure 9
	Figure 9-Source data 1
	Two-tailed unpaired Student's t test
		Group	Genotype	n	mean	SEM	p value	t	d.f.
	9B	Control	Pdgfra-CreER; R26-EYFP	3	1.003	± 0.328	0.0223	3.268	5
		Gsk3b cKO	Pdgfra-CreER; R26-EYFP; Gsk3bf/f	4	0.1037	± 0.0009
	9C (Total)	Control	Pdgfra-CreER; R26-EYFP	5	62.6	± 4.071	0.0029	4.232	8
		Gsk3b cKO	Pdgfra-CreER; R26-EYFP; Gsk3bf/f	5	85.3	± 3.507
	9C (NG2+)	Control	Pdgfra-CreER; R26-EYFP	5	52.2	± 3.194	0.01	3.354	8
		Gsk3b cKO	Pdgfra-CreER; R26-EYFP; Gsk3bf/f	5	72.2	± 5.008
	9E (CC)	Control	Pdgfra-CreER; R26-EYFP	8	840.1	± 135.8	0.0122	2.946	12
		Gsk3b cKO	Pdgfra-CreER; R26-EYFP; Gsk3bf/f	6	1374	± 102.8
	9E (CTX)	Control	Pdgfra-CreER; R26-EYFP	8	218.8	± 10.16	0.0008	4.439	12
		Gsk3b cKO	Pdgfra-CreER; R26-EYFP; Gsk3bf/f	6	288.9	± 12.24
	9F (CC)	Control	Pdgfra-CreER; R26-EYFP	8	465.8	± 99.11	0.0162	2.796	12
		Gsk3b cKO	Pdgfra-CreER; R26-EYFP; Gsk3bf/f	6	858.6	± 93.42
	9F (CTX)	Control	Pdgfra-CreER; R26-EYFP	8	55.21	± 3.332	0.0009	4.356	12
		Gsk3b cKO	Pdgfra-CreER; R26-EYFP; Gsk3bf/f	6	91.47	± 8.621
	9G (CC)	Control	Pdgfra-CreER; R26-EYFP	8	206.7	± 22.23	0.4889	0.714	12
		Gsk3b cKO	Pdgfra-CreER; R26-EYFP; Gsk3bf/f	6	226.3	± 10.16
	9G (CTX)	Control	Pdgfra-CreER; R26-EYFP	8	119.2	± 7.256	0.0794	1.917	12
		Gsk3b cKO	Pdgfra-CreER; R26-EYFP; Gsk3bf/f	6	137.4	± 4.957
	9H (CC)	Control	Pdgfra-CreER; R26-EYFP	8	590.6	± 64.89	0.1184	1.682	12
		Gsk3b cKO	Pdgfra-CreER; R26-EYFP; Gsk3bf/f	6	722.9	± 25.04
	9H (CTX)	Control	Pdgfra-CreER; R26-EYFP	8	246.1	± 7.256	0.7708	0.298	12
		Gsk3b cKO	Pdgfra-CreER; R26-EYFP; Gsk3bf/f	6	239	± 4.957
	9I (CC)	OPC-Control	Pdgfra-CreER; R26-EYFP	8	28.65	± 3.989	0.0327	2.414	12
		OPC-Gsk3b cKO	Pdgfra-CreER; R26-EYFP; Gsk3bf/f	6	17.12	± 1.270
		PreOL-Control	Pdgfra-CreER; R26-EYFP	8	20.77	± 3.103	0.9153	0.1086	12
		PreOL-Gsk3b cKO	Pdgfra-CreER; R26-EYFP; Gsk3bf/f	6	21.22	± 2.349
		OL-Control	Pdgfra-CreER; R26-EYFP	8	50.58	± 6.078	0.168	1.467	12
		OL-Gsk3b cKO	Pdgfra-CreER; R26-EYFP; Gsk3bf/f	6	61.66	± 3.053
	9I (CC)	OPC-Control	Pdgfra-CreER; R26-EYFP	8	54.55	± 2.233	0.123	1.659	12
		OPC-Gsk3b cKO	Pdgfra-CreER; R26-EYFP; Gsk3bf/f	6	48.2	± 3.288
		PreOL-Control	Pdgfra-CreER; R26-EYFP	8	20.03	± 1.313	0.8842	0.1488	12
		PreOL-Gsk3b cKO	Pdgfra-CreER; R26-EYFP; Gsk3bf/f	6	20.44	± 2.718
		OL-Control	Pdgfra-CreER; R26-EYFP	8	25.42	± 1.585	0.0427	2.266	12
		OL-Gsk3b cKO	Pdgfra-CreER; R26-EYFP; Gsk3bf/f	6	31.36	± 2.174
	9L	Control	R26-EYFP	3	0.7783	± 0.002	0.0001	14.93	4
		Gsk3b cKO	Pdgfra-CreER; R26-EYFP; Gsk3bf/f	3	0.7126	± 0.003
	9M	Control	R26-EYFP	3	13.06	± 1.044	0.0334	3.183	4
		Gsk3b cKO	Pdgfra-CreER; R26-EYFP; Gsk3bf/f	3	25.37	± 3.724
